# Supplementary material
Source: PubMed Central journal article supplement (PMC6952577)
Supplement: NIHMS1050660-supplement-Supp_TableS1.pdf [file NIHMS1050660-supplement-Supp_TableS1.pdf]

**Supplementary Table 1. Correlates of caregivers' overall social resource use**

|                                        | OR        | 95% CI |       |
|----------------------------------------|-----------|--------|-------|
|                                        |           | Lower  | Upper |
| Gender                                 |           |        |       |
| Male                                   | reference |        |       |
| Female                                 | 2.51      | 1.17   | 5.36  |
| Employment status                      |           |        |       |
| Employed full time                     | 0.58      | 0.35   | 0.96  |
| Employed part time or not employed     | reference |        |       |
| Patient gender                         |           |        |       |
| Male                                   | reference |        |       |
| Female                                 | 0.77      | 0.37   | 1.62  |
| Coresident with patient                |           |        |       |
| Yes, lives with patient                | 0.84      | 0.57   | 1.23  |
| No, does not live with patient         | reference |        |       |
| Patient concurrent social resource use |           |        |       |
| None                                   | reference |        |       |
| One or more                            | 2.52      | 1.68   | 3.80  |
| Study condition                        |           |        |       |
| Control                                | reference |        |       |
| Intervention                           | 2.24      | 1.37   | 3.67  |
| Time since diagnosis (months)          | 1.05      | 0.99   | 1.10  |

OR: Odds ratio; CI: Confidence interval

Data are from the Comprehensive Health Enhancement Support System (CHESS) – Prolonging Life study (2009-2012)
