# Supplementary material
Source: PubMed Central journal article supplement (PMC6952577)
Supplement: NIHMS1050660-supplement-Supp_TableS2.pdf [file NIHMS1050660-supplement-Supp_TableS2.pdf]

**Supplementary Table 2. Characteristics of informal caregivers of lung cancer survivors in the CHES-Prolonging Life Study (2009-2012)**

| N                                                             | Social Activities <sup>a</sup> |                |                    | p-value |
|---------------------------------------------------------------|--------------------------------|----------------|--------------------|---------|
|                                                               | Total<br>202                   | None<br>68     | One or more<br>134 |         |
|                                                               | % or Mean (SD)                 | % or Mean (SD) | % or Mean (SD)     |         |
| <i>Caregiver Characteristics</i>                              |                                |                |                    |         |
| Age (years) <sup>b</sup>                                      | 54.78 (12.11)                  | 53.57 (11.40)  | 55.40 (12.46)      | 0.59    |
| Gender                                                        |                                |                |                    | 0.04    |
| Male                                                          | 34.7%                          | 44.1%          | 29.9%              |         |
| Female                                                        | 65.3%                          | 55.9%          | 70.1%              |         |
| Race/Ethnic Heritage                                          |                                |                |                    | 0.48    |
| White (non-Hispanic)                                          | 82.7%                          | 85.3%          | 81.3%              |         |
| Other                                                         | 17.3%                          | 14.7%          | 18.7%              |         |
| Highest Education Level                                       |                                |                |                    | 0.22    |
| High School or less                                           | 22.3%                          | 29.4%          | 18.7%              |         |
| Some college                                                  | 33.2%                          | 29.4%          | 35.1%              |         |
| Bachelor's degree or higher                                   | 44.6%                          | 41.2%          | 46.3%              |         |
| Employment Status                                             |                                |                |                    | 0.01    |
| Employed part-time or not employed                            | 58.4%                          | 45.6%          | 64.9%              |         |
| Employed full-time                                            | 41.6%                          | 54.4%          | 35.1%              |         |
| Household Income                                              |                                |                |                    | 0.50    |
| ≤\$40,000                                                     | 17.3%                          | 19.1%          | 16.4%              |         |
| \$40,001-<\$80,000                                            | 28.2%                          | 23.5%          | 30.6%              |         |
| \$80,001-<\$100,000                                           | 16.8%                          | 13.2%          | 18.7%              |         |
| ≥\$100,000                                                    | 32.7%                          | 39.7%          | 29.1%              |         |
| Unknown/unreported at baseline                                | 5.0%                           | 4.4%           | 5.2%               |         |
| Relationship to patient <sup>b</sup>                          |                                |                |                    | 0.90    |
| Spouse                                                        | 71.1%                          | 70.6%          | 71.4%              |         |
| Other                                                         | 28.9%                          | 29.4%          | 28.6%              |         |
| Who Caregiver lives with <sup>b</sup>                         |                                |                |                    | 0.75    |
| Lives with patient                                            | 79.2%                          | 77.9%          | 79.9%              |         |
| Doesn't live with patient                                     | 20.8%                          | 22.1%          | 20.1%              |         |
| Caregiver's health conditions                                 |                                |                |                    | 0.69    |
| No conditions                                                 | 53.5%                          | 51.5%          | 54.5%              |         |
| One or more conditions                                        | 46.5%                          | 48.5%          | 45.5%              |         |
| How much support do caregivers receive from others (baseline) |                                |                |                    | 0.56    |
| None                                                          | 16.8%                          | 22.1%          | 14.2%              |         |
| A little                                                      | 26.2%                          | 23.5%          | 27.6%              |         |
| A medium amount                                               | 24.3%                          | 23.5%          | 24.6%              |         |
| Quite a bit/a lot                                             | 32.7%                          | 30.9%          | 33.6%              |         |
| How satisfied are caregivers with help (baseline)             |                                |                |                    | 0.56    |
| Low-medium satisfaction                                       | 30.7%                          | 35.3%          | 28.4%              |         |
| Quite satisfied                                               | 34.7%                          | 30.9%          | 36.6%              |         |
| Very satisfied                                                | 34.7%                          | 33.8%          | 35.1%              |         |

|                                                       |               |               |               |      |
|-------------------------------------------------------|---------------|---------------|---------------|------|
| Clinically Significant Depressive Symptoms (baseline) |               |               |               | 0.40 |
| No                                                    | 61.4%         | 57.4%         | 63.4%         |      |
| Yes                                                   | 38.6%         | 42.6%         | 36.6%         |      |
| <i>Patient Characteristics</i>                        |               |               |               |      |
| Age (years) <sup>b</sup>                              | 59.82 (10.60) | 60.05 (9.10)  | 59.71 (11.32) | 0.97 |
| Gender                                                |               |               |               | 0.20 |
| Male                                                  | 49.0%         | 42.6%         | 52.2%         |      |
| Female                                                | 51.0%         | 57.4%         | 47.8%         |      |
| Symptoms <sup>c</sup>                                 | 24.53 (16.65) | 26.61 (18.07) | 23.48 (15.84) | 0.18 |
| Co-morbid health conditions <sup>b</sup>              |               |               |               | 0.30 |
| None                                                  | 50.7%         | 45.6%         | 53.4%         |      |
| One or more                                           | 49.3%         | 54.4%         | 46.6%         |      |
| Physical Well-being <sup>d</sup>                      | 1.26 (0.89)   | 1.36 (0.88)   | 1.21 (0.90)   | 0.10 |
| Functional Well-being <sup>d</sup>                    | 2.37 (0.90)   | 2.21 (0.90)   | 2.45 (0.90)   | 0.04 |
| <i>Clinical characteristics</i>                       |               |               |               |      |
| Metastases                                            | 21.8%         | 19.1%         | 23.1%         | 0.51 |
| Types of treatment received <sup>e</sup>              |               |               |               |      |
| Chemotherapy                                          | 57.4%         | 66.2%         | 53.0%         | 0.07 |
| Radiation therapy                                     | 31.7%         | 32.4%         | 31.3%         | 0.88 |
| Surgery                                               | 10.9%         | 11.8%         | 10.4%         | 0.78 |
| Recurrent cancer                                      | 9.4%          | 10.3%         | 9.0%          | 0.76 |
| Time since diagnosis at baseline (months)             |               |               |               | 0.10 |
| <1                                                    | 13.9%         | 11.8%         | 14.9%         |      |
| 1                                                     | 33.2%         | 35.3%         | 32.1%         |      |
| 2                                                     | 26.2%         | 26.5%         | 26.1%         |      |
| 3                                                     | 12.4%         | 19.1%         | 9.0%          |      |
| 4 or more                                             | 14.4%         | 7.4%          | 17.9%         |      |
| Mean (SD)                                             | 2.58 (2.06)   | 2.39 (1.56)   | 2.68 (2.26)   | 0.28 |

---

CHES: Comprehensive Health Enhancement Support System; SD: Standard deviation

<sup>a</sup>Summed across time points

<sup>b</sup>N=201

<sup>c</sup>Patient symptoms were measured using the Edmonton Symptom Assessment Scale (possible scores: 0-100)

<sup>d</sup>Patient physical and functional well-being were measured using the Functional Assessment of Cancer Therapy Scale (FACT-L Version 4).

<sup>e</sup>Not mutually exclusive
