# Supplementary material
Source: PubMed Central journal article supplement (PMC6952577)
Supplement: NIHMS1050660-supplement-Supp_TableS3.pdf [file NIHMS1050660-supplement-Supp_TableS3.pdf]

**Supplementary Table 3. Correlates of caregivers' overall social resource use (CHESS control condition only)**

|                                        | OR        | 95% CI |       |
|----------------------------------------|-----------|--------|-------|
|                                        |           | Lower  | Upper |
| Gender                                 |           |        |       |
| Male                                   | reference |        |       |
| Female                                 | 4.02      | 1.54   | 10.48 |
| Employment status                      |           |        |       |
| Employed full time                     | 0.39      | 0.19   | 0.80  |
| Employed part time or not employed     | reference |        |       |
| Patient gender                         |           |        |       |
| Male                                   | reference |        |       |
| Female                                 | 1.32      | 0.52   | 3.38  |
| Coresident with patient                |           |        |       |
| Yes, lives with patient                | 1.03      | 0.59   | 1.80  |
| No, does not live with patient         | reference |        |       |
| Patient concurrent social resource use |           |        |       |
| None                                   | reference |        |       |
| One or more                            | 2.98      | 1.66   | 5.36  |
| Time since diagnosis (months)          | 1.03      | 0.94   | 1.12  |

OR: Odds Ratio; CI: Confidence Interval

Data are from the Comprehensive Health Enhancement Support System (CHESS) – Prolonging Life study (2009-2012)
