# Supplementary material
Source: PubMed Central journal article supplement (PMC6952577)
Supplement: NIHMS1050660-supplement-Supp_TableS4.pdf [file NIHMS1050660-supplement-Supp_TableS4.pdf]

**Supplementary Table 4. Correlates of caregivers' formal social resource (CHESS control condition only)**

|                                          | OR        | 95% CI |       |
|------------------------------------------|-----------|--------|-------|
|                                          |           | Lower  | Upper |
| <b>Coresidence</b>                       |           |        |       |
| Caregiver does not live with patient     | reference |        |       |
| Caregiver lives with patient             | 0.54      | 0.24   | 1.22  |
| <b>Income</b>                            |           |        |       |
| <=\$40,000                               | reference |        |       |
| \$40,000-\$80,000                        | 3.72      | 0.86   | 16.07 |
| \$80,000-\$100,000                       | 2.73      | 0.49   | 15.28 |
| \$100,000 or more                        | 5.14      | 1.14   | 23.25 |
| Unreported                               | n/a       |        |       |
| <b>Caregiver comorbidities</b>           |           |        |       |
| None                                     | reference |        |       |
| One or more                              | 2.82      | 1.03   | 7.72  |
| <b>Satisfaction with caregiving help</b> |           |        |       |
| Low-medium satisfaction                  | reference |        |       |
| Quite satisfied                          | 0.66      | 0.20   | 2.22  |
| Very satisfied                           | 0.41      | 0.12   | 1.33  |
| <b>Patient comorbidities</b>             |           |        |       |
| None                                     | reference |        |       |
| One or more                              | 0.61      | 0.21   | 1.73  |
| <b>Recurrent cancer</b>                  |           |        |       |
| No                                       | reference |        |       |
| Yes                                      | 4.22      | 1.52   | 11.69 |
| <b>Patient social resource use</b>       |           |        |       |
| None                                     | reference |        |       |
| One or more                              | 2.28      | 0.81   | 6.37  |
| <b>Time since diagnosis</b>              |           |        |       |
| Months                                   | 1.31      | 0.76   | 2.25  |
| Months squared                           | 0.99      | 0.95   | 1.02  |

OR: Odds Ratio; CI: Confidence Interval

Data are from the Comprehensive Health Enhancement Support System (CHESS) – Prolonging Life study (2009-2012)
