# Supplementary material
Source: PubMed Central journal article supplement (PMC6952577)
Supplement: NIHMS1050660-supplement-Supp_TableS5.pdf [file NIHMS1050660-supplement-Supp_TableS5.pdf]

**Supplementary Table 5. Correlates of caregivers' informal social resource use (CHESS control condition only)**

|                                    | OR        | 95% CI |       |
|------------------------------------|-----------|--------|-------|
|                                    |           | Lower  | Upper |
| Age (years)                        | 1.06      | 1.02   | 1.10  |
| Gender                             |           |        |       |
| Male                               | reference |        |       |
| Female                             | 11.10     | 3.31   | 37.16 |
| Employment                         |           |        |       |
| Employed full time                 | 0.53      | 0.23   | 1.20  |
| Employed part time or not employed | reference |        |       |
| Patient gender                     |           |        |       |
| Male                               | reference |        |       |
| Female                             | 2.31      | 0.87   | 6.09  |
| Surgery (yes vs no)                | 0.67      | 0.12   | 3.67  |
| Recurrent cancer (yes vs no)       | 0.11      | 0.03   | 0.39  |
| Patient social resource use        |           |        |       |
| None                               | reference |        |       |
| One or more                        | 2.95      | 1.57   | 5.54  |
| Time since diagnosis (months)      | 1.02      | 0.91   | 1.13  |

OR: Odds Ratio; CI: Confidence Interval

Data are from the Comprehensive Health Enhancement Support System (CHESS) – Prolonging Life study (2009-2012)
