# Supplementary material
Source: PubMed Central journal article supplement (PMC6952577)
Supplement: NIHMS1050660-supplement-Supp_TableS6.pdf [file NIHMS1050660-supplement-Supp_TableS6.pdf]

**Supplementary Table 6. Correlates of social resource use among lung cancer caregivers - all covariates**

|                                        | OR        | 95% CI |       |
|----------------------------------------|-----------|--------|-------|
|                                        |           | Lower  | Upper |
| Age                                    | 1.04      | 1.01   | 1.08  |
| Gender                                 |           |        |       |
| Male                                   | reference |        |       |
| Female                                 | 4.55      | 1.75   | 11.85 |
| Employment status                      |           |        |       |
| Employed full time                     | 0.74      | 0.41   | 1.34  |
| Employed part time or not emr          | reference |        |       |
| Income                                 |           |        |       |
| ≤\$40,000                              | reference |        |       |
| \$40,000-\$80,000                      | 1.69      | 0.67   | 4.23  |
| \$80,000-\$100,000                     | 1.18      | 0.44   | 3.12  |
| \$100,000 or more                      | 0.83      | 0.35   | 1.98  |
| Unreported                             | 1.02      | 0.24   | 4.32  |
| Caregiver's health conditions          |           |        |       |
| No conditions                          | reference |        |       |
| One or more conditions                 | 0.98      | 0.59   | 1.63  |
| Coresidence status                     |           |        |       |
| Lives with patient                     | 0.75      | 0.49   | 1.15  |
| Does not live with patient             | reference |        |       |
| Satisfaction with caregiving help      |           |        |       |
| Low-medium satisfaction                | reference |        |       |
| Quite satisfied                        | 1.20      | 0.76   | 1.91  |
| Very satisfied                         | 0.76      | 0.48   | 1.22  |
| <i>Patient Characteristics</i>         |           |        |       |
| Gender                                 |           |        |       |
| Male                                   | reference |        |       |
| Female                                 | 1.01      | 0.45   | 2.27  |
| Patient comorbid conditions            |           |        |       |
| None                                   | reference |        |       |
| One or more                            | 0.61      | 0.34   | 1.10  |
| Patient concurrent social resource use |           |        |       |
| None                                   | reference |        |       |
| One or more                            | 2.53      | 1.59   | 4.03  |
| <i>Clinical Characteristics</i>        |           |        |       |
| Received Cancer Surgery                | 0.43      | 0.16   | 1.14  |
| Recurrent cancer                       | 0.82      | 0.33   | 1.00  |
| Study condition                        |           |        |       |
| Control                                | reference |        |       |
| Intervention                           | 2.37      | 1.38   | 4.06  |
| Time since diagnosis (months)          | 1.05      | 0.99   | 1.10  |

OR: Odds Ratio; CI: Confidence Interval

Data are from the Comprehensive Health Enhancement Support System (CHESS) – Prolonging Life study (2009-2012)
