# Supplementary material
Source: PubMed Central journal article supplement (PMC6952577)
Supplement: NIHMS1050660-supplement-Supp_TableS7.pdf [file NIHMS1050660-supplement-Supp_TableS7.pdf]

**Supplementary Table 7. Correlates of caregivers' formal social resource use - all selected covariates**

|                                        | OR        | 95% CI |       |
|----------------------------------------|-----------|--------|-------|
|                                        |           | Lower  | Upper |
| Age                                    | 1.00      | 0.97   | 1.03  |
| Gender                                 |           |        |       |
| Male                                   | reference |        |       |
| Female                                 | 1.80      | 0.65   | 5.02  |
| Employment status                      |           |        |       |
| Employed full time                     | 1.29      | 0.56   | 2.97  |
| Employed part time or not em           | reference |        |       |
| Income                                 |           |        |       |
| ≤\$40,000                              | reference |        |       |
| \$40,000-\$80,000                      | 0.75      | 0.28   | 2.00  |
| \$80,000-\$100,000                     | 1.28      | 0.46   | 3.54  |
| \$100,000 or more                      | 0.40      | 0.14   | 1.17  |
| Unreported                             | 0.14      | 0.01   | 1.56  |
| Caregiver's health conditions          |           |        |       |
| No conditions                          | reference |        |       |
| One or more conditions                 | 2.31      | 1.17   | 4.58  |
| Coresidence status                     |           |        |       |
| Lives with patient                     | 0.67      | 0.40   | 1.13  |
| Does not live with patient             | reference |        |       |
| Satisfaction with caregiving help      |           |        |       |
| Low-medium satisfaction                | reference |        |       |
| Quite satisfied                        | 0.67      | 0.36   | 1.24  |
| Very satisfied                         | 0.29      | 0.14   | 0.61  |
| <i>Patient Characteristics</i>         |           |        |       |
| Gender                                 |           |        |       |
| Male                                   | reference |        |       |
| Female                                 | 0.70      | 0.29   | 1.67  |
| Patient comorbid conditions            |           |        |       |
| None                                   | reference |        |       |
| One or more                            | 0.51      | 0.27   | 0.96  |
| Patient concurrent social resource use |           |        |       |
| None                                   | reference |        |       |
| One or more                            | 2.32      | 1.20   | 4.49  |
| <i>Clinical Characteristics</i>        |           |        |       |
| Received Cancer Surgery                | 0.81      | 0.30   | 2.23  |
| Recurrent cancer                       | 2.20      | 0.76   | 1.00  |
| Study condition                        |           |        |       |
| Control                                | reference |        |       |
| Intervention                           | 1.52      | 0.76   | 3.04  |
| Time since diagnosis                   |           |        |       |
| Months                                 | 1.49      | 1.09   | 2.04  |
| Months squared                         | 0.98      | 0.95   | 1.00  |

OR: Odds Ratio; CI: Confidence Interval

Data are from the Comprehensive Health Enhancement Support System (CHESS) – Prolonging Life study (2009-2012)
