# Supplementary material
Source: PubMed Central journal article supplement (PMC6952577)
Supplement: NIHMS1050660-supplement-Supp_TableS8.pdf [file NIHMS1050660-supplement-Supp_TableS8.pdf]

**Supplementary Table 8. Correlates of caregivers' informal social resource use - all covariates**

|                                        | OR        | 95% CI |       |
|----------------------------------------|-----------|--------|-------|
|                                        |           | Lower  | Upper |
| Age                                    | 1.05      | 1.02   | 1.08  |
| Gender                                 |           |        |       |
| Male                                   | reference |        |       |
| Female                                 | 4.68      | 1.80   | 12.18 |
| Employment status                      |           |        |       |
| Employed full time                     | 0.62      | 0.34   | 1.11  |
| Employed part time or not emr          | reference |        |       |
| Income                                 |           |        |       |
| ≤\$40,000                              | reference |        |       |
| \$40,000-\$80,000                      | 1.60      | 0.66   | 3.87  |
| \$80,000-\$100,000                     | 0.88      | 0.33   | 2.31  |
| \$100,000 or more                      | 0.97      | 0.40   | 2.37  |
| Unreported                             | 1.86      | 0.45   | 7.76  |
| Caregiver's health conditions          |           |        |       |
| No conditions                          | reference |        |       |
| One or more conditions                 | 0.78      | 0.44   | 1.35  |
| Coresidence status                     |           |        |       |
| Lives with patient                     | 0.88      | 0.54   | 1.42  |
| Does not live with patient             | reference |        |       |
| Satisfaction with caregiving help      |           |        |       |
| Low-medium satisfaction                | reference |        |       |
| Quite satisfied                        | 1.35      | 0.83   | 2.20  |
| Very satisfied                         | 1.19      | 0.75   | 1.89  |
| <i>Patient Characteristics</i>         |           |        |       |
| Gender                                 |           |        |       |
| Male                                   | reference |        |       |
| Female                                 | 1.13      | 0.50   | 2.55  |
| Patient comorbid conditions            |           |        |       |
| None                                   | reference |        |       |
| One or more                            | 0.77      | 0.42   | 1.39  |
| Patient concurrent social resource use |           |        |       |
| None                                   | reference |        |       |
| One or more                            | 2.23      | 1.44   | 3.43  |
| <i>Clinical Characteristics</i>        |           |        |       |
| Received Cancer Surgery                | 0.69      | 0.27   | 1.73  |
| Recurrent cancer                       | 0.31      | 0.12   | 1.00  |
| Study condition                        |           |        |       |
| Control                                | reference |        |       |
| Intervention                           | 2.42      | 1.42   | 4.13  |
| Time since diagnosis (months)          | 1.02      | 0.97   | 1.07  |

OR: Odds ratio; CI: Confidence interval

Data are from the Comprehensive Health Enhancement Support System (CHESS) – Prolonging Life study (2009-2012)
